# Supplementary material for: Role of Aquaporins in a Composite Model of Water Transport in the Leaf
Source: MDPI journal article supplement (doi:10.3390/ijms17071045), 2016-06-30
Supplement: s1 [file s1]

# Supplementary Materials: Role of Aquaporins in a Composite Model of Water Transport in the Leaf

Adi Yaaran and Menachem Moshelion

**Table S1.** Possible water-related, post-translational regulation of AQPs.

|          | Trigger                                                        | Research Approach/Findings                                                                                                                                                                                                                                                      | Suggested Mechanism                                                                                                                     | Reference |
|----------|----------------------------------------------------------------|---------------------------------------------------------------------------------------------------------------------------------------------------------------------------------------------------------------------------------------------------------------------------------|-----------------------------------------------------------------------------------------------------------------------------------------|-----------|
| Membrane | Changes in cell turgor                                         | Hydraulic conductivity of <i>Zea mays</i> parenchyma cells increased as light intensity increased. Yet, when transportation reduce cells turgor (more than 0.2 MPa reduction) $L_p$ was reduced despite light.                                                                  | AQP-gating (light and turgor).                                                                                                          | [59]      |
|          | Membrane tension/changes in cell turgor                        | Membrane trafficking inhibitors inhibited the rate at which the volume of intact <i>Vicia faba</i> guard cells decreased following 0–1.5 MPa osmotic treatments.                                                                                                                | None.                                                                                                                                   | [101]     |
|          | Membrane tension                                               | Pulses of turgor pressure on individual young <i>Zea mays</i> root cortex cells decreased the hydraulic conductivity ( $L_p$ ) of those cells. Cells with high $L_p$ responded to $HgCl_2$ .                                                                                    | Inhibition was in proportion with the absolute value of water flow within the channel, possibly due to a mechanical stimulus.           | [102]     |
|          | Membrane surface tension/changes in cell turgor                | Osmotic permeability ( $P_f$ ) and activation energy for water transport ( $E_a$ ) of TIP2;1 grapevine ( <i>Vitis vinifera</i> ) were dependent on internal turgor pressure.                                                                                                    | TIP2;1 acts as a gate in an internal pressure-dependent manner.                                                                         | [120]     |
| Stresses | Drought stress/drop in cytoplasmic pH (anoxia due to flooding) | X-rays of spinach ( <i>Spinacia oleracea</i> ) SoPIP2;1 in its closed and open conformation; molecular dynamic simulations.                                                                                                                                                     | Dephosphorylation of two conserved serine residues; protonation of a conserved histidine residue.                                       | [106]     |
|          | Long-term drought                                              | Dephosphorylation of PIP2s in tobacco ( <i>Nicotiana tabacum</i> ) leaves exposed to long-term drought; $HgCl_2$ decreased the water permeability of the leaf tissues of well-irrigated leaves.                                                                                 | AQP-gating (closed conformation) by dephosphorylation.                                                                                  | [109]     |
|          | ABA                                                            | Phosphoproteome analysis following ABA treatment revealed decreased phosphorylation of four members of the <i>Arabidopsis thaliana</i> PM AQP family.                                                                                                                           | AQP-gating (closed conformation) by ABA-dependent dephosphorylation.                                                                    | [110]     |
|          | Apoplastic water potential/turgor                              | Osmotic stress changes AQP phosphorylation in spinach ( <i>Spinacia oleracea</i> ), in a manner dependent upon submicromolar concentrations of $Ca^{2+}$ . AQP transcript levels are high in vascular tissue.                                                                   | Phosphorylation by PM-associated protein kinase is strictly dependent on submicromolar concentrations of $Ca^{2+}$ .                    | [107]     |
|          | Osmotic stress                                                 | Mannitol-induced water imbalance resulted in increased AQP in tonoplast fractions of ice plants ( <i>Mesembryanthemum crystallinum</i> ), as well as a shift in AQP distribution in other membrane fractions. Redistribution of McTIP1;2 was limited by trafficking inhibitors. | AQP re-localization suggests a role for glycosylation and the involvement of a cAMP-dependent signal in the redistribution of McTIP1;2. | [114]     |
|          | Osmotic gating                                                 | Inhibition of AQP activity in isolated <i>Chara corallina</i> internodes increased with as the concentration and molecular size of solutes increased (reflection coefficients).                                                                                                 | Cohesion/tension model of AQP-gating.                                                                                                   | [121,122] |
|          | Salinity                                                       | Exposure of <i>Arabidopsis thaliana</i> roots to salt induces the redistribution of AQP to intracellular spherical structures tentatively identified as intravacuolar invaginations.                                                                                            | Subcellular re-localization of PIPs and TIPs.                                                                                           | [115]     |

Table S1. Cont.

|             | Trigger                             | Research Approach/Findings                                                                                                                                                                                                                                              | Suggested Mechanism                                                                                               | Reference |
|-------------|-------------------------------------|-------------------------------------------------------------------------------------------------------------------------------------------------------------------------------------------------------------------------------------------------------------------------|-------------------------------------------------------------------------------------------------------------------|-----------|
| Ion signals | Apoplast pH                         | HgCl <sub>2</sub> prevented acidity induces swelling and floating of <i>Rhizopus delemars</i> spores.                                                                                                                                                                   | pH-dependent AQP gating via histidine residues on the outer surface of the cell.                                  | [111]     |
|             | Ca <sup>2+</sup> and H <sup>+</sup> | Adding Ca <sup>2+</sup> caused a 4-fold reduction in the hydraulic conductivity of <i>Arabidopsis thaliana</i> cells in suspension. The ability of purified plasma-membrane vesicles to transport water was reversibly blocked by Ca <sup>2+</sup> and H <sup>+</sup> . | Ca <sup>2+</sup> and H <sup>+</sup> are involved in AQP-gating.                                                   | [113]     |
|             | Divalent cations and protons        | Cd <sup>2+</sup> and Mn <sup>2+</sup> were also identified as potent inhibitors of <i>Pichia pastoris</i> AtPIP2;1S, showing dose-dependent effects on proteoliposomes containing AtPIP2;1.                                                                             | Specific residues are involved in binding divalent cations and/or stabilizing open- or closed-pore conformations. | [112]     |
| Temperature | Temperature change (5 °C to 20 °C)  | Incorporation of <sup>32</sup> P into AQP in microsomal membranes of tulip ( <i>Tulipa gesnerina</i> ) petals was temperature- and time-dependent.                                                                                                                      | Phosphorylation of AQP by PM associated protein kinase is dependent on the concentration of Ca <sup>2+</sup> .    | [108]     |
| Unknown     | ?                                   | Co-expression and physical interaction of nonfunctional and functional ZmPIPs resulted in changes in the permeability of <i>Xenopus</i> oocytes to water, based on the amount of injected complementary RNA.                                                            | Formation of alternative heterotetramers alters AQP activity.                                                     | [116]     |
|             | ?                                   | Artificial heterotetramers with a defined proportion of NtAQP1 to tPIP2;1 tetramer affected the transport of water in yeast.                                                                                                                                            | Formation of alternative heterotetramers alters AQP activity.                                                     | [119]     |
|             | ?                                   | MpPIP1;1 (which exhibits no water-channel activity) facilitated the activity of MpPIP2;1 in a phosphorylation-dependent manner.                                                                                                                                         | Cooperative regulation of MpPIP2;1 was regulated by phosphorylation of MpPIP1;1.                                  | [117]     |
